# Supplementary material for: The Potential of Class II Bacteriocins to Modify Gut Microbiota to Improve Host Health
Source: PLoS One. 2016 Oct 3;11(10):e0164036. doi: 10.1371/journal.pone.0164036 (PMC5047636; doi:10.1371/journal.pone.0164036)
Supplement: S3 Table — The statistical significances of differences in unweighted UniFrac distances in terms of groups (pooled vs individual samples) and time were shown. The non-parametric p-values were calculated performing two-sample t-tests for the pairs of the groups with Monte Carlo permutations (n = 1,000) and corrected with Bonferroni method. (XLSX) [file pone.0164036.s006.xlsx]

## Sheet: Ark1
S3 Table. Comparison of UniFrac distances of pooled and individual samples.
Group 1	Group 2	t statistic	Nonparametric p-value	Nonparametric p-value (Bonferroni-corrected)
All within groups	All between groups	0.795426	0.439	1
All within Time	All between Time	-4.69217	0.001	0.105
The statistical significances of differences in unweighted UniFrac distances in terms of groups (pooled vs individual samples) and time were shown.
The nonparametric p-values were calculated performing two-sample t-tests for the pairs of the groups with Monte Carlo permutations (n = 1,000)
and corrected with Bonferroni method.
