# Supplementary material for: The Potential of Class II Bacteriocins to Modify Gut Microbiota to Improve Host Health
Source: PLoS One. 2016 Oct 3;11(10):e0164036. doi: 10.1371/journal.pone.0164036 (PMC5047636; doi:10.1371/journal.pone.0164036)
Supplement: S6 Table — (XLSX) [file pone.0164036.s009.xlsx]

## Sheet: Sheet1
S6 Table. In vitro antimicrobial activity assay of bacteriocins against the indicator strains listed.
Indicator Strain	LMG collection #	SakA(+)	SakA(-)	PedPA-1(+)	PedPA-1(-)	enterocins(+)	enterocins(-)	plantaricins(+)	plantaricins(-)	GarML(+)	GarML(-)
Enterococcus avium 208	LMG 3465					+				+++
Enterococcus faecalis UI 50	LMG 2333	+++		+++		+	+
Enterococcus faecium L50	LMG 2763	+		+
Enteroccous faecium P21	LMG 2783	+++		+++		++	++
Enterococcus AL41	LMG 2876			+++
Lactobacillus curvatus 89	LMG 2355					+
Lactobacillus curvatus CTC 435	LMG 2371	++		+		+	+			+
Lactobacillus sakei 706	LMG 2334			+		++				+
Lactobacillus sake LS3	LMG 2356					(+)
Lactocbacillus sakei 148	LMG 2361					++				++
Lactobacillus sakei	LMG 2380	+		+++
Lactobacillus sakei 791	LMG 2799	+		+		+	+	+		+
Lactobacillus salivarius UCC118	LMG 2787	+		+++		++				+
Lactobacillus curvatus NCFB 2739 B	LMG 2715			+++		+		+		+
Lactobacillus ssp 965	LMG 2003					+		+		+	+
Lactobacillus plantarum R	LMG 2352			+		+				++
Lactobacillus plantarum C11	LMG 2358			+						+
Pediococcus pentosaceus FBB 63 B	LMG 2722	+		+++		+	+	+		+
Pediococcus acidilactici Pac1.0	LMG 2002					+++	(+)	+		+++
Pediococcus pentosaceus FBB61.1	LMG 2001			+++		+++	+	+		++
Pediococcus pentosaceus PPE 1-2 M	LMG 2366			+			+			++
Lactococcus F4-13	LMG 2070			(+)						(+)
Lactococcus lactis IL1403	LMG 2705					+				+++
Lactococcus garvieae DCC43	LMG 3390					+
Lactococcus F14	LMG 2081					+				+++
Lactococcus lactis 1403	LMG 2130					+				+++
Lactococcus lactis QU5	LMG 3419					+				+++
Listeria innocua	LMG 2710	+++		+++		+++	+++
Listeria innocua	LMG 2785	+		+++		+
Listeria ivanovii Li4	LMG 2813	++		+++
Listeria monocytogenes 279 serotype 4	LMG 2650	+++		+++		+++	+++
Listeria monocytogenes	LMG 2652	+++		+++		+++	+++
Listeria monocytogenes 223 serotype 1	LMG 2653	+++		+++		++	++
Staphylococcus aureus	LMG 3242					+				+	+
